1 **Title:** Race is not Associated with Medical Emergency Team Evaluation Prior to In-Hospital  
2 Cardiac Arrest

3 **Authors:** Cody-Aaron L. Gathers MD<sup>a</sup>, Ryan W. Morgan MD MTR<sup>b</sup>, Jessica S. Alvey MS<sup>c</sup>, Ron  
4 Reeder PhD<sup>c</sup>, Zachary D. Goldberger MD<sup>d</sup>, Jessica Fowler MD MPH<sup>b</sup>, Maryam Y. Naim MD  
5 MSCE<sup>b</sup>, Amanda O'Halloran MD<sup>b</sup>, Raina M. Merchant MD MSHP<sup>d</sup>, Martha Kienzle MD<sup>b</sup>,  
6 Vinay Nadkarni MD<sup>b</sup>, Robert A. Berg MD<sup>b</sup>, Robert M. Sutton MD MSCE<sup>b</sup>, for the American  
7 Heart Association's Get With The Guidelines®-Resuscitation Investigators

8 **Affiliations:** <sup>a</sup>Department of Anesthesiology and Critical Care, University of Pennsylvania,  
9 Philadelphia, PA; <sup>b</sup>Department of Anesthesiology & Critical Care Medicine, Children's Hospital  
10 of Philadelphia and Perelman School of Medicine at the University of Pennsylvania,  
11 Philadelphia, PA <sup>c</sup>Department of Pediatrics, University of Utah, Salt Lake City, UT;  
12 <sup>d</sup>Department of Medicine, Division of Cardiovascular Medicine, University of Wisconsin,  
13 Madison, WI; <sup>d</sup>Department of Emergency Medicine, University of Pennsylvania, Philadelphia,  
14 PA

15 **Address correspondence to:** Cody-Aaron Gathers, MD, Department of Anesthesiology and  
16 Critical Care Medicine, Children's Hospital of Philadelphia, 3401 Civic Center Blvd  
17 Critical Care, 9 Main, Suite 9NW45, Philadelphia, PA 19104, [gathersc@chop.edu](mailto:gathersc@chop.edu), 843-324-  
18 0105.

19 **Short title:** Race and Medical Emergency Evaluation

20  
21  
22  
23  
24  
25  
26

27 **Abstract**

28 **Background:** Black patients have worse outcomes after in-hospital cardiac arrest (IHCA).

29 Whether these racial disparities are associated with medical emergency team (MET) evaluation  
30 prior to IHCA remains unknown.

31 **Methods:** A retrospective cohort study of adults age  $\geq 18$  years from the American Heart  
32 Association Get With The Guidelines® Resuscitation registry who had an IHCA between 2000  
33 and 2021 with acute physiologic decline (modified early warning score [MEWS]  $\geq 3$ ) during the  
34 24 hours prior to IHCA. A propensity-weighted cohort was constructed to balance confounders  
35 between Black and White patients. The association between race and MET evaluation was  
36 quantified with weighted multivariable logistic regression.

37 **Results:** Among 354,480 patients, 88,507 met the initial inclusion criteria, of which 29,714  
38 patients (median age 69 [IQR 58-79] years, 42.5% female, and 26.9% Black) had acute  
39 physiologic decline during the 24 hours prior to IHCA. Among patients with acute physiologic  
40 decline, 4102 (13.8%) patients had a preceding MET evaluation before IHCA. Rates of MET  
41 evaluation prior to cardiac arrest did not differ significantly between Black and White patients  
42 with acute physiologic decline (aOR 1.02, 95% CI 0.94-1.11,  $p = 0.62$ ).

43 **Conclusions:** Though racial disparities in IHCA outcomes exist, this study did not detect a  
44 difference in rates of MET evaluation prior to IHCA among patients with acute physiologic  
45 decline as a potential mechanism for these disparities.

46

47

48

49

## 50 **Clinical Perspective**

### 51 **What Is New?**

- 52 • With the goal to identify potential mechanisms leading to racial disparities in outcomes  
53 from adult in-hospital cardiac arrest (IHCA), this multicenter prospective observational  
54 study is the first study to analyze the association between race and medical emergency  
55 team (MET) evaluation among patients with evidence of clinical deterioration. IHCA
- 56 • We found that rates of MET evaluation among patients with clinical deterioration (i.e.,  
57 vital sign abnormalities) prior to IHCA did not differ between Black and White patients.

### 58 **What Are the Clinical Implications?**

- 59 • These data demonstrate that race is not associated with MET evaluation prior to adult in-  
60 hospital cardiac arrest.
- 61 • Future studies should evaluate other links in the American Heart Association's in-  
62 hospital chain of survival (e.g., resuscitation quality, post-arrest care) as potential targets  
63 to mitigate racial disparities in IHCA survival.

64

65

66

67

68

69

70

71

72

73 **Introduction**

74           Among adults who sustain an in-hospital cardiac arrest (IHCA), Black patients have  
75 lower survival rates compared to White patients.<sup>1-3</sup> Delayed defibrillation, higher severity of  
76 chronic medical conditions, and variations in hospital quality have been postulated as potential  
77 mechanisms for the racial disparity in IHCA survival.<sup>2,4-6</sup> However, the reason for this disparity  
78 largely remains elusive.

79           A medical emergency team (MET), also known as a rapid response team, serves to  
80 respond to patients at risk of acute decompensation to prevent IHCA and has been integrated as a  
81 key link in the American Heart Association (AHA) IHCA Chain of Survival.<sup>7,8</sup> However, the  
82 association between METs and IHCA incidence and in-hospital mortality is inconsistent.<sup>9-11</sup> A  
83 previous study demonstrated that only 17% of patients had a MET evaluation prior to IHCA and  
84 most patients without a MET evaluation prior to IHCA had at least one severe vital sign  
85 abnormality within 4 hours prior to IHCA.<sup>12</sup> To our knowledge, prior studies have not evaluated  
86 whether racial differences in MET evaluation prior to IHCA exist. Given the well-documented  
87 racial disparity in IHCA outcomes and the potential role of a MET in preventing IHCA, an  
88 analysis of the role of race as a contributor to MET evaluation prior to IHCA is warranted.

89           The primary aim of this study was to evaluate the association of race with MET  
90 evaluation for patients at risk of acute decompensation prior to IHCA. Acknowledging the  
91 documented racial disparities in hospital care, we hypothesized that Black patients would be less  
92 likely to receive a MET evaluation prior to IHCA as compared to White patients.<sup>13</sup>

93

94 **Methods**

95

96 **Study population**

97 A retrospective cohort study utilizing the American Heart Association (AHA) Get With  
98 The Guidelines®-Resuscitation (GWTG-R) registry was conducted. The GWTG-R program is  
99 provided by the AHA. This national registry is a large, voluntary, multi-center, prospective  
100 database of IHCA which has been previously described in detail.<sup>14</sup> Hospitals participating in the  
101 registry submit clinical information regarding the medical history, hospital care, and outcomes of  
102 consecutive patients hospitalized for cardiac arrest using an online, interactive case report form  
103 and Patient Management Tool—PMT™ (IQVIA, Parsippany, New Jersey). All participating  
104 institutions were required to comply with local regulatory and privacy guidelines and, if  
105 required, to secure institutional review board approval. Because data were used primarily at the  
106 local site for quality improvement, sites were granted a waiver of informed consent under the  
107 common rule. IQVIA serves as the data collection (through their PMT) and coordination center  
108 for the American Heart Association/American Stroke Association GWTG-R programs.

109 Within the registry, cardiac arrest is defined as either pulselessness or a pulse with  
110 inadequate perfusion requiring chest compressions and/or defibrillation of ventricular fibrillation  
111 or pulseless ventricular tachycardia. Quality improvement hospital personnel enroll patients with  
112 a cardiac arrest without do-not-resuscitate orders who undergo cardiopulmonary resuscitation  
113 (CPR). The registry utilizes standardized Utstein-style definitions to report patient variables and  
114 outcomes across sites.<sup>15,16</sup> Data accuracy is ensured by thorough training of research personnel  
115 and standardized software. This research did not meet the definition of human subjects research  
116 by Children’s Hospital of Philadelphia and was deemed exempt from human subjects research  
117 (IRB 21-019305).

118 **Cohort Design**

119 The study cohort was obtained from hospitals that submitted data on adults 18 years of  
120 age or older to the GWTG-R registry between January 1, 2000 and May 10, 2021. The GWTG-R  
121 registry cardiopulmonary arrest (CPA) and MET databases were linked and the cohort was  
122 derived from hospitals with 10 or more IHCA that reported both CPA and MET data. Given the  
123 primary exposure of Black or White race, this study excluded patients of other races or patients  
124 for whom race information was incomplete or missing. The cohort was further confined to only  
125 include index IHCA that occurred after the date of the site's first MET evaluation as a surrogate  
126 of when the MET was instituted at a given hospital. We further excluded patients with a cardiac  
127 arrest not on a general inpatient unit (defined as general inpatient area, rehab, skilled nursing, or  
128 mental health unit) or a telemetry unit (defined as adult coronary unit, telemetry unit, or step-  
129 down unit) as MET evaluations do not typically occur in these locations. Similarly to a previous  
130 study analyzing missed opportunities for MET evaluations, we further delineated the cohort to  
131 include patients who had a MET evaluation on a general inpatient unit or telemetry unit,  
132 transferred to the ICU after MET evaluation, and afterward had an IHCA within 24 hours of  
133 transfer to assign credit for the MET evaluation.<sup>12</sup> The primary cohort was additionally restricted  
134 to exclude patients with missing vital signs or a modified early warning score (MEWS) < 3.

135

### 136 **Study variables and outcomes**

137 The primary exposure variable was race (Black vs. White) among patients with acute  
138 physiologic decline (MEWS  $\geq$  3) within 24 hours of cardiac arrest. Race was classified as  
139 identified in the patient's medical record. The primary outcome was MET evaluation (Yes vs.  
140 No). Patient data included demographic characteristics (age, sex), illness category (medical  
141 cardiac, medical non-cardiac, surgical-cardiac, surgical non-cardiac), cardiac arrest location

142 (general inpatient unit, telemetry unit, or ICU), pre-existing conditions (acute central nervous  
143 system [CNS] non-stroke event; acute stroke; baseline CNS depression; congestive heart failure  
144 [current or prior]; diabetes mellitus; renal, respiratory, or hepatic insufficiency; hypotension or  
145 hypoperfusion; major trauma; metastatic or hematologic malignancy; metabolic or electrolyte  
146 abnormality; myocardial infarction [current or prior]; sepsis or pneumonia); initial rhythm of  
147 cardiac arrest (ventricular fibrillation, pulseless ventricular tachycardia, asystole, pulseless  
148 electrical activity, bradycardia, or other/unknown), interventions in place before the cardiac  
149 arrest (antiarrhythmic infusions, arterial catheter, dialysis, electrocardiogram monitor,  
150 supplemental oxygen, vascular access, vasoactive agent), whether the event was witnessed,  
151 timing of the cardiac arrest (weekday [7:00 AM-10:59 PM], weeknight [11:00 PM-6:59 AM],  
152 weekend, or holiday), event duration, medications administered during arrest (epinephrine,  
153 vasopressors other than epinephrine bolus, sodium bicarbonate, calcium chloride or gluconate,  
154 atropine, lidocaine, amiodarone), and MEWS.

155         Given that vital sign abnormalities may signify that a patient warranted a MET  
156 evaluation, we included patients with a MEWS  $\geq 3$  within 24 hours of the IHCA. The MEWS is  
157 a bedside evaluation tool based on five physiologic parameters: systolic blood pressure, heart  
158 rate, respiratory rate, temperature, and level of consciousness for a maximum score of 14.<sup>17</sup>  
159 Specific values for assignment of the MEWS are outlined in Supplemental Table 1. A MEWS  $>$   
160 4 signifies a high risk for death.<sup>18</sup> For this analysis, MEWS was calculated as a composite of  
161 blood pressure, heart rate, respiratory rate, and temperature for a maximum MEWS of 11 (level  
162 of consciousness is not available in the database). As METs serve to intervene on patients before  
163 cardiac arrest (i.e., before they are at high risk of death), we incorporated a more sensitive cut off

164 for MEWS ( $\geq 3$ ), which may signify acute physiologic decline and consideration for MET  
165 evaluation.

166 Hospital characteristics included hospital teaching status, hospital bed number,  
167 geographic region, and hospital racial composition. Hospital teaching status was defined as  
168 major teaching (fellowship program), minor teaching (only a residency program), or nonteaching  
169 (no residency or fellowship program). Hospital bed number was categorized as less than 200  
170 beds, 200-499 beds, or 500 or more beds. Geographic region was characterized as North Mid  
171 Atlantic, South Atlantic and Puerto Rico, North Central, South Central, or Mountain and Pacific.  
172 Hospital racial composition was defined as a hospital with a patient population that is less than  
173 10% Black, 10%-30% Black, or more than 30% Black adopted from a previous study analyzing  
174 hospital racial composition and cardiac arrest outcomes.<sup>6</sup> Hospital racial composition has been  
175 shown to influence cardiac arrest outcomes with hospitals with a higher proportion of Black  
176 patients having worse outcomes after cardiac arrest.<sup>6</sup>

177

## 178 **Statistical analysis**

179 To assess the association of race with MET evaluation, propensity weighted regression  
180 was utilized to reduce potential confounding due to a priori selected variables including age, sex,  
181 illness category, pre-existing conditions, cardiac arrest location, and hospital characteristics.<sup>19</sup>  
182 While propensity weighted regression is traditionally used to balance confounders between  
183 treatment groups, it is equally well-suited to balance confounders between Black and White  
184 patients. Three steps were utilized to construct a cohort of Black and White patients that are  
185 balanced with respect to potentially confounding factors.



186 First, a multivariable logistic regression model of race was created using the variables  
187 described above as predictors. For patients with any missing pre-existing condition, “missing”  
188 was coded as a separate category to indicate the patient was missing this information and to  
189 equally balance missing data between the propensity-matched cohorts. Variables included in the  
190 propensity model included age, sex, illness category, pre-existing conditions, cardiac arrest  
191 location, and hospital characteristics. A butterfly plot of propensities was constructed for Black  
192 and White patients with acute physiologic decline within 24 hours of cardiac arrest  
193 (Supplemental Figure 1). Patients with propensity scores outside of the region of overlap  
194 between the histograms were excluded from the final multivariable model assessing the  
195 association between race and MET evaluation.

196 Second, patients were weighted utilizing stabilized inverse probability of treatment  
197 weights. This weighting increases the balance of a priori characteristics between Black and  
198 White patients, creating a weighted cohort in which patients differ with respect to race but are  
199 balanced with respect to potentially confounding variables. This is the mechanism by which  
200 confounding from characteristics is reduced. Differences in means and proportions were  
201 compared between Black and White patients. The cohorts were balanced when the absolute  
202 standardized difference for each variable was  $<0.10$  (Supplemental Table 2).

203 Third, a logistic regression model was constructed using the weighted cohort to assess the  
204 association of race and MET evaluation prior to IHCA for all patients with acute physiologic  
205 decline. The model utilized a robust variance estimator to account for the correlation due to  
206 clustering of patients within hospitals and further adjusted for hospital teaching status to account  
207 for variability of MET implementation across hospitals.<sup>12</sup>

208 All analyses were performed using SAS 9.4 (SAS Institute; Cary, NC) and the AHA  
209 Precision Medicine Platform (<https://precision.heart.org/>) with reported p-values based on a two-  
210 sided alternative and considered significant if less than 0.05.

## 211 **Results**

212 Among 354,480 patients at eligible hospitals, 29,714 who met inclusion criteria had acute  
213 physiologic decline within 24 hours prior to IHCA (Figure 1). Baseline characteristics of the  
214 balanced cohorts are included in Table 1. The median age was 69 (IQR 58-79) years, 12,643  
215 (42.5%) were female, and 7993 (26.9%) were Black. The median MEWS was 4 (IQR 3-5), and  
216 vital signs were measured at a median time of 114 minutes (IQR 58-202) prior to IHCA.

217 Among patients with acute physiologic decline, 4102 (13.8%) had a documented MET  
218 evaluation prior to IHCA. After adjusting for potential confounders, there was no significant  
219 difference in MET evaluation between Black vs. White patients with acute physiologic decline  
220 within 24 hours prior to IHCA (aOR 1.02, 95% CI 0.94-1.11,  $p = 0.62$ , Table 2).

221

## 222 **Discussion**

223 In this large, multi-center, propensity weighted cohort study of MET evaluation prior to  
224 IHCA, we failed to detect an association between race and MET evaluation prior to IHCA. This  
225 is notable as racial disparities in IHCA outcomes do not appear to be attributed to differences in  
226 rates of MET evaluations between Black and White patients.

227 Previous studies have shown racial differences in cardiac arrest outcomes.<sup>1-3</sup> While some  
228 studies suggest that delayed defibrillation, severity of chronic illnesses, and variation in hospital  
229 quality may contribute to the racial disparities in IHCA outcomes, no study has convincingly  
230 identified a mechanism for these disparities.<sup>2,4,5</sup> A previous study demonstrated that only 1 out of

231 7 patients has a MET evaluation prior to IHCA, and many patients have severely abnormal vital  
232 signs prior to IHCA.<sup>12</sup> Given the low rate of MET evaluation prior to IHCA and the role of MET  
233 evaluation in potentially mitigating IHCA, our study builds upon previous observations by  
234 evaluating the association of race and MET evaluation prior to IHCA to better elucidate a  
235 potential mechanism for racial disparities in IHCA outcomes.

236         The lack of an association between race and MET evaluation prior to IHCA can  
237 potentially be explained by patient acuity prior to cardiac arrest—a patient who is acutely  
238 decompensating should warrant a MET evaluation and ICU transfer regardless of their race.  
239 While this study did not identify a statistically significant relationship between race and MET  
240 evaluation prior to IHCA, it is important to continue to recognize the role of implicit bias in  
241 clinical decision making, particularly in high acuity environments where implicit bias may be  
242 magnified.<sup>20–22</sup> Additionally, there may be competing needs (notifying other medical teams or  
243 goals of care discussions with families) prior to cardiac arrest, and a MET evaluation might not  
244 be prioritized in that moment.<sup>12</sup> Moreover, the composition and implementation of METs is  
245 subject to significant variability between hospitals.<sup>12,23</sup> This variability further contributes to a  
246 lack of standardization for MET intervention and may further explain the lack of an association  
247 between race and MET evaluation prior to IHCA. Our study further adjusted for hospital  
248 teaching status to potentially account for this variability and found no statistically significant  
249 difference in the odds of MET evaluation between Black and White patients.

250         Given that we did not detect an association between race and MET evaluations prior to  
251 cardiac arrest, the results of this study suggest that further investigation is required to further  
252 clarify the mechanisms for disparate IHCA outcomes between Black and White patients. Early  
253 recognition and prevention of cardiac arrest is one link in the AHA IHCA Chain of Survival.<sup>8</sup>

254 Further research should investigate and further clarify the contribution of high-quality CPR,  
255 defibrillation, post-cardiac arrest care, and recovery to improve these core domains of the AHA  
256 Chain of Survival in hospital resuscitation systems. Given this study and the known differences  
257 in hospital resuscitation systems, particular consideration on racial disparities in high-quality  
258 CPR and post-cardiac arrest care can be prioritized.<sup>24,25</sup>

259 This study must be interpreted in the context of its limitations. The data available in  
260 GWTG-R do not account for unmeasured confounders that may contribute to MET evaluation.  
261 Notable potential confounders that were not collected that are associated with adverse outcomes  
262 include socioeconomic status, the primary language of the patient, the presence of a family  
263 member at the bedside, hospital staffing, hospital acuity at the time of the IHCA, and experience  
264 of the primary team.<sup>12,26-30</sup> Additionally, there is significant variability in the composition and  
265 implementation of METs between hospitals that cannot be completely accounted for by hospital  
266 teaching status.<sup>12</sup> Moreover, the hospitals that participate in GWTG-R may have more robust  
267 MET evaluation systems in place than other hospitals, potentially limiting generalizability. We  
268 are unable to determine if there was a delay in timing of MET evaluation in relation to the first  
269 detection of acute physiologic decline, an important factor known to affect patient outcomes after  
270 MET evaluation. Lastly, there is a potential for exposure misclassification as race is collected  
271 from the medical record.

272

## 273 **Conclusion**

274 In this propensity weighted cohort study, no association between race and MET  
275 evaluation prior to IHCA was detected as a potential mechanism for racial disparities in IHCA

276 outcomes. Further investigation is required to examine mechanisms behind racial disparities in  
277 IHCA outcomes.

278

279 **Acknowledgements:** We would like to acknowledge the GTWG-R Adult Research Task Force:  
280 Anne Grossestreuer PhD; Ari Moskowitz MD MPH; Joseph Ornato MD FACP FACC FACEP;  
281 Matthew Churpek MD MPH PhD; Monique Anderson Starks MD MHS; Paul Chan MD MSc;  
282 Saket Girotra MD SM; Sarah Perman MD MSCE

283

284 **Funding/Support:** This study was funded by an AHA GWTG-R Early Career Investigator  
285 Research Award (awarded to Dr. Gathers), the Children’s Hospital of Philadelphia Resuscitation  
286 Science Center, and the Children’s Hospital of Philadelphia Department of Anesthesiology and  
287 Critical Care Medicine. Dr. Gathers effort on this study was additionally supported by an  
288 National Institutes of Health (NIH) Training Grant T32HL098054. Dr. Morgan’s effort on this  
289 study was supported by the NIH (K23HL148541). Dr. Merchant is the PI of NIH NHLBI  
290 R01HL1-141844, NIH/DHHS R01 MH127686, and NIH K24 HL157621. Dr. Merchant is the PI  
291 of NIH NHLBI R01HL1-141844, NIH/DHHS R01 MH127686, and NIH K24 HL157621. Dr  
292 Nadkarni receives support to his institution for research unrelated to this project from Zoll  
293 Medical, the American Heart Association, RQI Partners, the NIH, Department of Defense, and  
294 Nihon-Kohden. He serves as the 2023-2024 President of the Society of Critical Care Medicine  
295 (SCCM), but the views expressed in this manuscript are his and not intended to represent the  
296 views of the SCCM. Dr. Berg receives support to his institution for research unrelated to this  
297 project from NHBLI and NICHD.

298

299 **Role of Funder/Sponsor:** The American Heart Association Get With The Guidelines

300 Resuscitation Adult Research Task Force reviewed the initial study design and final manuscript.

301

302 **Conflict of Interest Disclosures:** none

303

304 **Abbreviations:** IHCA = In-Hospital Cardiac Arrest, MET = Medical Emergency Team, AHA =

305 American Heart Association, ICU = Intensive Care Unit, GWTG-R = Get With The Guidelines-

306 Resuscitation, PMT = Patient Management Tool, CPR = Cardiopulmonary Resuscitation, CPA =

307 Cardiopulmonary Arrest, MEWS= Modified Early Warning Score, CNS = Central Nervous

308 System, ROC = Return Of Circulation, ROSC = Return Of Spontaneous Circulation, CPC =

309 Cerebral Performance Category, aOR = Adjusted Odds Ratio

310

311 **Authorship contribution statement**

312 Cody-Aaron Gathers: conceptualization, data interpretation, drafting of the original manuscript,

313 critical revision of the manuscript

314 Ryan Morgan: conceptualization, data interpretation, critical revision of the manuscript,

315 supervision

316 Jessica Alvey: conceptualization, statistical analysis, data interpretation, critical revision of the

317 manuscript

318 Ron Reeder: conceptualization, statistical analysis, data interpretation, critical revision of the

319 manuscript

320 Zachary Goldberger: critical revision of the manuscript

321 Jessica Fowler: conceptualization, critical revision of the manuscript

322 Maryam Naim: conceptualization, critical revision of the manuscript

323 Amanda O'Halloran: conceptualization, critical revision of the manuscript

324 Raina Merchant: conceptualization, critical revision of the manuscript

325 Martha Kienzle: conceptualization, critical revision of the manuscript

326 Vinay Nadkarni: conceptualization, critical revision of the manuscript

327 Robert Berg: conceptualization, critical revision of the manuscript

328 Bobby Sutton: conceptualization, data interpretation, critical revision of the manuscript,

329 supervision

### 330 **References**

331 1. Chan PS, Nichol G, Krumholz HM, et al. Racial Differences in Survival After In-Hospital  
332 Cardiac Arrest. *JAMA*. 2009;302(11):1195-1201. doi:10.1001/jama.2009.1340

333 2. Razi RR, Churpek MM, Yuen TC, et al. Racial disparities in outcomes following PEA and  
334 asystole in-hospital cardiac arrests. *Resuscitation*. 2015;87:69-74.  
335 doi:10.1016/j.resuscitation.2014.11.026

336 3. Joseph L, Chan PS, Bradley SM, et al. Temporal Changes in the Racial Gap in Survival After  
337 In-Hospital Cardiac Arrest. *JAMA Cardiol*. 2017;2(9):976. doi:10.1001/jamacardio.2017.2403

338 4. Chan PS, Krumholz HM, Nichol G, Nallamothu BK. Delayed Time to Defibrillation after In-  
339 Hospital Cardiac Arrest. *N Engl J Med*. 2008;358(1):9-17. doi:10.1056/NEJMoa0706467

340 5. Brooks Carthon M, Brom H, McHugh M, et al. Better Nurse Staffing Is Associated With  
341 Survival for Black Patients and Diminishes Racial Disparities in Survival After In-Hospital  
342 Cardiac Arrests. *Medical Care*. 2021;59(2). [https://journals.lww.com/lww-](https://journals.lww.com/lww-medicalcare/fulltext/2021/02000/better_nurse_staffing_is_associated_with_survival.12.aspx)  
343 [medicalcare/fulltext/2021/02000/better\\_nurse\\_staffing\\_is\\_associated\\_with\\_survival.12.aspx](https://journals.lww.com/lww-medicalcare/fulltext/2021/02000/better_nurse_staffing_is_associated_with_survival.12.aspx)

344 6. Merchant RM, Becker LB, Yang F, Groeneveld PW. Hospital racial composition: A neglected  
345 factor in cardiac arrest survival disparities. *Am Heart J*. 2011;161(4):705-711.  
346 doi:10.1016/j.ahj.2011.01.011

347 7. Chan PS. Rapid Response Teams: A Systematic Review and Meta-analysis. *Arch Intern Med*.  
348 2010;170(1):18. doi:10.1001/archinternmed.2009.424

349 8. Berg KM, Cheng A, Panchal AR, et al. Part 7: Systems of Care: 2020 American Heart  
350 Association Guidelines for Cardiopulmonary Resuscitation and Emergency Cardiovascular  
351 Care. *Circulation*. 2020;142(16\_suppl\_2). doi:10.1161/CIR.0000000000000899

- 352 9. Maharaj R, Raffaele I, Wendon J. Rapid response systems: a systematic review and meta-  
353 analysis. *Crit Care*. 2015;19(1):254. doi:10.1186/s13054-015-0973-y
- 354 10. Winters BD, Weaver SJ, Pfoh ER, Yang T, Pham JC, Dy SM. Rapid-Response Systems  
355 as a Patient Safety Strategy: A Systematic Review. *Ann Intern Med*. 2013;158(5\_Part\_2):417.  
356 doi:10.7326/0003-4819-158-5-201303051-00009
- 357 11. Berwick DM, Calkins DR, McCannon CJ, Hackbarth AD. The 100 000 Lives Campaign:  
358 Setting a Goal and a Deadline for Improving Health Care Quality. *JAMA*. 2006;295(3):324.  
359 doi:10.1001/jama.295.3.324
- 360 12. Chan ML, Spertus JA, Tang F, Jayaram N, Chan PS. Missed opportunities in use of  
361 medical emergency teams prior to in-hospital cardiac arrest. *Am Heart J*. 2016;177:87-95.  
362 doi:10.1016/j.ahj.2016.04.014
- 363 13. Chauhan A, Walton M, Manias E, et al. The safety of health care for ethnic minority  
364 patients: a systematic review. *Int J Equity Health*. 2020;19(1):118. doi:10.1186/s12939-020-  
365 01223-2
- 366 14. Peberdy MA, Kaye W, Ornato JP, et al. Cardiopulmonary resuscitation of adults in the  
367 hospital: A report of 14 720 cardiac arrests from the National Registry of Cardiopulmonary  
368 Resuscitation. *Resuscitation*. 2003;58(3):297-308. doi:10.1016/S0300-9572(03)00215-6
- 369 15. Jacobs I, Nadkarni V, the ILCOR Task Force on Cardiac Arrest and Cardiopulmonary  
370 Resuscitation Outcomes, et al. Cardiac Arrest and Cardiopulmonary Resuscitation Outcome  
371 Reports: Update and Simplification of the Utstein Templates for Resuscitation Registries: A  
372 Statement for Healthcare Professionals From a Task Force of the International Liaison  
373 Committee on Resuscitation (American Heart Association, European Resuscitation Council,  
374 Australian Resuscitation Council, New Zealand Resuscitation Council, Heart and Stroke  
375 Foundation of Canada, InterAmerican Heart Foundation, Resuscitation Councils of Southern  
376 Africa). *Circulation*. 2004;110(21):3385-3397. doi:10.1161/01.CIR.0000147236.85306.15
- 377 16. Cummins RO, Chamberlain D, Hazinski MF, et al. Recommended Guidelines for  
378 Reviewing, Reporting, and Conducting Research on In-Hospital Resuscitation: The In-  
379 Hospital 'Utstein Style': A Statement for Healthcare Professionals From the American Heart  
380 Association, the European Resuscitation Council, the Heart and Stroke Foundation of Canada,  
381 the Australian Resuscitation Council, and the Resuscitation Councils of Southern Africa.  
382 *Circulation*. 1997;95(8):2213-2239. doi:10.1161/01.CIR.95.8.2213
- 383 17. Stenhouse C, Coates S, Tivey M, Allsop P, Parker T. Prospective evaluation of a  
384 modified Early Warning Score to aid earlier detection of patients developing critical illness on  
385 a general surgical ward. *British Journal of Anaesthesia*. 2000;84(5):663P.  
386 doi:10.1093/bja/84.5.663
- 387 18. Subbe CP, Kruger M, Rutherford P, Gemmel L. Validation of a modified Early Warning  
388 Score in medical admissions. *QJM*. 2001;94(10):521-526. doi:10.1093/qjmed/94.10.521



- 389 19. Haukoos JS, Lewis RJ. The Propensity Score. *JAMA*. 2015;314(15):1637.  
390 doi:10.1001/jama.2015.13480
- 391 20. Dehon E, Weiss N, Jones J, Faulconer W, Hinton E, Sterling S. A Systematic Review of  
392 the Impact of Physician Implicit Racial Bias on Clinical Decision Making. Choo EK, ed. *Acad*  
393 *Emerg Med*. 2017;24(8):895-904. doi:10.1111/acem.13214
- 394 21. Gopal DP, Chetty U, O'Donnell P, Gajria C, Blackadder-Weinstein J. Implicit bias in  
395 healthcare: clinical practice, research and decision making. *Future Healthc J*. 2021;8(1):40-  
396 48. doi:10.7861/fhj.2020-0233
- 397 22. Johnson TJ, Hickey RW, Switzer GE, et al. The Impact of Cognitive Stressors in the  
398 Emergency Department on Physician Implicit Racial Bias. Gerson L, ed. *Acad Emerg Med*.  
399 2016;23(3):297-305. doi:10.1111/acem.12901
- 400 23. Jones DA, DeVita MA, Bellomo R. Rapid-Response Teams. *N Engl J Med*.  
401 2011;365(2):139-146. doi:10.1056/NEJMra0910926
- 402 24. Gravesteijn BY, Schlupe M, Lingsma HF, et al. Between-centre differences in care for  
403 in-hospital cardiac arrest: a prospective cohort study. *Critical Care*. 2021;25(1):329.  
404 doi:10.1186/s13054-021-03754-8
- 405 25. Chan JL, Lehrich J, Nallamotheu BK, et al. Association Between Hospital Resuscitation  
406 Champion and Survival for In-Hospital Cardiac Arrest. *Journal of the American Heart*  
407 *Association*. 2021;10(5):e017509. doi:10.1161/JAHA.120.017509
- 408 26. Lawson NR, Acorda D, Guffey D, et al. Association of Social Determinants of Health  
409 With Rapid Response Events: A Retrospective Cohort Trial in a Large Pediatric Academic  
410 Hospital System. *Front Pediatr*. 2022;10:853691. doi:10.3389/fped.2022.853691
- 411 27. Calderone A, Debay V, Goldfarb MJ. Family Presence on Rounds in Adult Critical Care:  
412 A Scoping Review. *Critical Care Explorations*. 2022;4(11):e0787.  
413 doi:10.1097/CCE.0000000000000787
- 414 28. Jacobowski NL, Girard TD, Mulder JA, Ely EW. Communication in Critical Care:  
415 Family Rounds in the Intensive Care Unit. *American Journal of Critical Care*.  
416 2010;19(5):421-430. doi:10.4037/ajcc2010656
- 417 29. Ajmi SC, Aase K. Physicians' clinical experience and its association with healthcare  
418 quality: a systematised review. *BMJ Open Qual*. 2021;10(4):e001545. doi:10.1136/bmjopq-  
419 2021-001545
- 420 30. Khan A, Parente V, Baird JD, et al. Association of Patient and Family Reports of  
421 Hospital Safety Climate With Language Proficiency in the US. *JAMA Pediatr*.  
422 2022;176(8):776. doi:10.1001/jamapediatrics.2022.1831

Figure 1: CONSORT Diagram

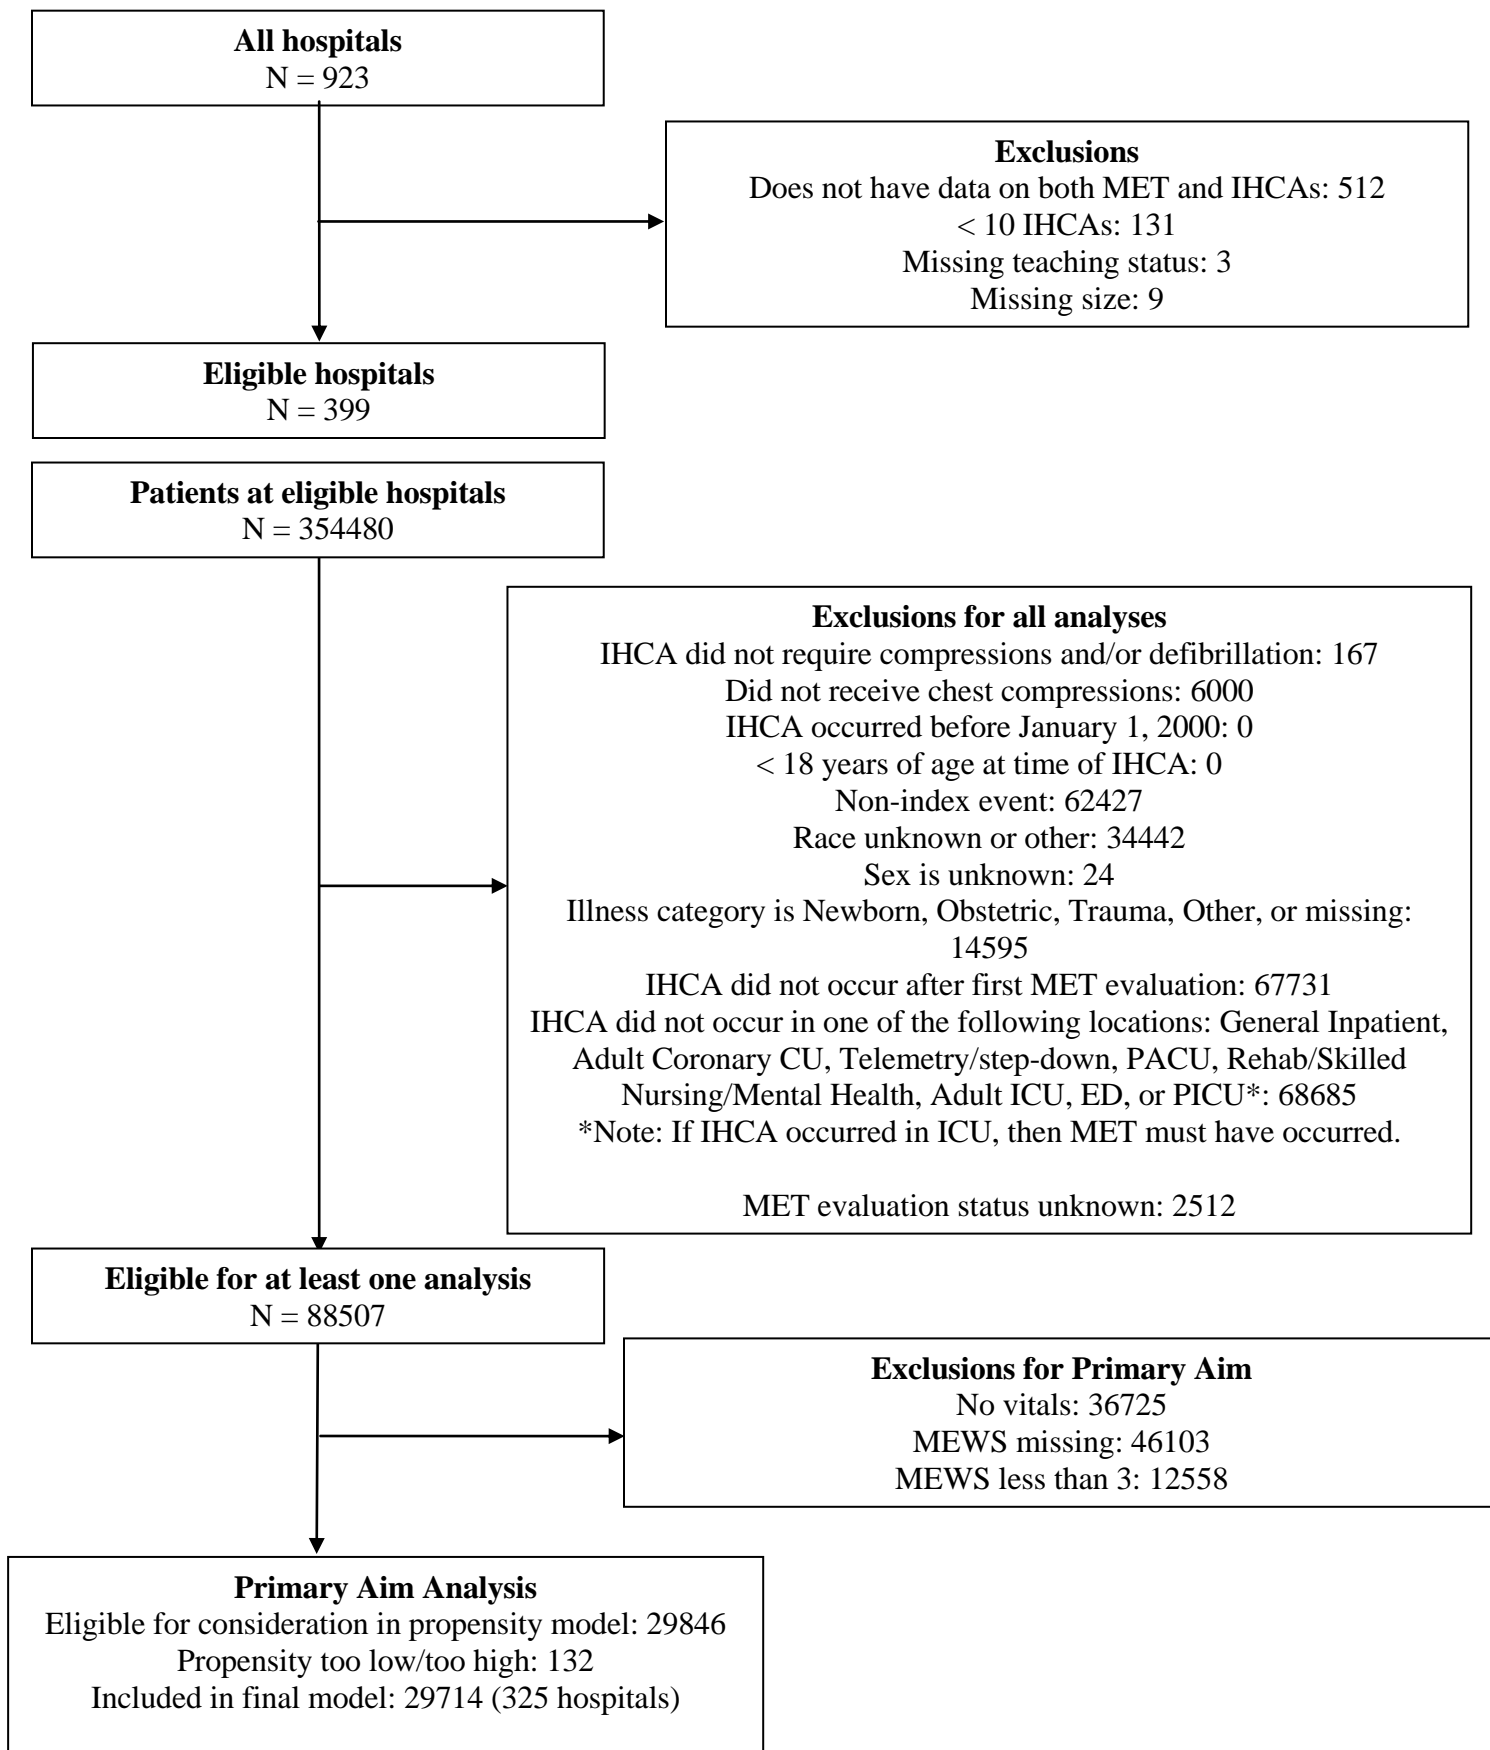

**Table 1: Primary Cohort Characteristics (Acute Physiologic Decline)**

|                                                    | <b>White</b><br>(N = 21721) | <b>Black</b><br>(N = 7993) | <b>Overall</b><br>(N = 29714) |
|----------------------------------------------------|-----------------------------|----------------------------|-------------------------------|
| <b>Patient and Event Characteristics</b>           |                             |                            |                               |
| Age (years)                                        | 71.0 [60.0, 80.0]           | 64.0 [54.0, 74.0]          | 69.0 [58.0, 79.0]             |
| Sex                                                |                             |                            |                               |
| Male                                               | 12928 (59.5%)               | 4143 (51.8%)               | 17071 (57.5%)                 |
| Female                                             | 8793 (40.5%)                | 3850 (48.2%)               | 12643 (42.5%)                 |
| Illness category                                   |                             |                            |                               |
| Medical-cardiac                                    | 8026 (37.0%)                | 2450 (30.7%)               | 10476 (35.3%)                 |
| Medical-noncardiac                                 | 10127 (46.6%)               | 4579 (57.3%)               | 14706 (49.5%)                 |
| Surgical-cardiac                                   | 1100 (5.1%)                 | 215 (2.7%)                 | 1315 (4.4%)                   |
| Surgical-noncardiac                                | 2468 (11.4%)                | 749 (9.4%)                 | 3217 (10.8%)                  |
| Location of cardiac arrest                         |                             |                            |                               |
| General Inpatient                                  | 8448 (38.9%)                | 3269 (40.9%)               | 11717 (39.4%)                 |
| Telemetry Unit                                     | 12089 (55.7%)               | 4214 (52.7%)               | 16303 (54.9%)                 |
| Intensive Care Unit                                | 1184 (5.5%)                 | 510 (6.4%)                 | 1694 (5.7%)                   |
| Event witnessed                                    | 15979 (73.6%)               | 5765 (72.1%)               | 21744 (73.2%)                 |
| Night, weekend, or holiday event                   | 11712 (53.9%)               | 4254 (53.2%)               | 15966 (53.7%)                 |
| MEWS before cardiac arrest                         | 4.0 [3.0, 5.0]              | 4.0 [3.0, 5.0]             | 4.0 [3.0, 5.0]                |
| MEWS time relative to cardiac arrest (minutes)     | 113.0<br>[57.0, 201.0]      | 115.0<br>[60.0, 202.0]     | 114.0<br>[58.0, 202.0]        |
| <b>Pre-Existing Conditions</b>                     |                             |                            |                               |
| Missing pre-existing condition                     | 2282 (10.5%)                | 768 (9.6%)                 | 3050 (10.3%)                  |
| Acute CNS non-stroke event                         | 1219 (5.6%)                 | 583 (7.3%)                 | 1802 (6.1%)                   |
| Acute stroke                                       | 635 (2.9%)                  | 322 (4.0%)                 | 957 (3.2%)                    |
| Baseline depression in CNS function                | 1705 (7.8%)                 | 774 (9.7%)                 | 2479 (8.3%)                   |
| Congestive heart failure (this admission)          | 3887 (17.9%)                | 1340 (16.8%)               | 5227 (17.6%)                  |
| Congestive heart failure (prior to this admission) | 5188 (23.9%)                | 2019 (25.3%)               | 7207 (24.3%)                  |
| Diabetes mellitus                                  | 6860 (31.6%)                | 2934 (36.7%)               | 9794 (33.0%)                  |
| Hepatic insufficiency                              | 1484 (6.8%)                 | 628 (7.9%)                 | 2112 (7.1%)                   |
| Hypotension/Hypoperfusion                          | 3833 (17.6%)                | 1439 (18.0%)               | 5272 (17.7%)                  |
| Major trauma                                       | 215 (1.0%)                  | 60 (0.8%)                  | 275 (0.9%)                    |
| Metastatic or hematologic malignancy               | 2808 (12.9%)                | 1150 (14.4%)               | 3958 (13.3%)                  |
| Metabolic/electrolyte abnormality                  | 3512 (16.2%)                | 1461 (18.3%)               | 4973 (16.7%)                  |
| Myocardial ischemia/infarction (this admission)    | 2716 (12.5%)                | 633 (7.9%)                 | 3349 (11.3%)                  |

**Table 1: Primary Cohort Characteristics (Acute Physiologic Decline)**

|                                                               |                  |                  |                  |
|---------------------------------------------------------------|------------------|------------------|------------------|
| Myocardial ischemia/infarction (prior to this admission)      | 3500 (16.1%)     | 729 (9.1%)       | 4229 (14.2%)     |
| Renal insufficiency                                           | 6785 (31.2%)     | 3386 (42.4%)     | 10171 (34.2%)    |
| Respiratory insufficiency                                     | 7573 (34.9%)     | 2686 (33.6%)     | 10259 (34.5%)    |
| Sepsis/pneumonia (including septicemia)                       | 5338 (24.6%)     | 2057 (25.7%)     | 7395 (24.9%)     |
| <b>Interventions</b>                                          |                  |                  |                  |
| Antiarrhythmic infusions                                      | 403 (1.9%)       | 75 (0.9%)        | 478 (1.6%)       |
| Arterial catheter                                             | 1100 (5.1%)      | 440 (5.5%)       | 1540 (5.2%)      |
| Dialysis                                                      | 422 (1.9%)       | 272 (3.4%)       | 694 (2.3%)       |
| ECG monitor                                                   | 15964 (73.6%)    | 5661 (70.9%)     | 21625 (72.9%)    |
| Supplemental oxygen                                           | 9587 (44.1%)     | 3290 (41.2%)     | 12877 (43.3%)    |
| Vascular access                                               | 20101 (92.7%)    | 7316 (91.7%)     | 27417 (92.4%)    |
| Vasoactive agent                                              | 2973 (13.7%)     | 1089 (13.6%)     | 4062 (13.7%)     |
| <b>Arrest Characteristics</b>                                 |                  |                  |                  |
| First documented rhythm                                       |                  |                  |                  |
| Asystole or PEA                                               | 15903 (73.2%)    | 6260 (78.3%)     | 22163 (74.6%)    |
| Ventricular fibrillation or pulseless ventricular tachycardia | 2929 (13.5%)     | 719 (9.0%)       | 3648 (12.3%)     |
| Bradycardia                                                   | 952 (4.4%)       | 404 (5.1%)       | 1356 (4.6%)      |
| Other or unknown                                              | 1937 (8.9%)      | 610 (7.6%)       | 2547 (8.6%)      |
| CPR duration (minutes) <sup>1</sup>                           | 16.0 [8.0, 27.0] | 16.0 [8.0, 27.0] | 16.0 [8.0, 27.0] |
| Epinephrine bolus                                             | 19086 (87.9%)    | 7331 (91.7%)     | 26417 (88.9%)    |
| Total number of epinephrine doses                             | 3.0 [2.0, 5.0]   | 3.0 [2.0, 5.0]   | 3.0 [2.0, 5.0]   |
| Time to first epinephrine (minutes) <sup>2</sup>              | 2.0 [1.0, 4.0]   | 2.0 [1.0, 4.0]   | 2.0 [1.0, 4.0]   |
| Epinephrine dosing interval (minutes)                         | 6.0 [4.2, 9.0]   | 5.8 [4.0, 8.5]   | 6.0 [4.2, 8.8]   |
| Vasopressor(s) other than epinephrine bolus                   | 6121 (28.2%)     | 2386 (29.9%)     | 8507 (28.6%)     |
| Sodium bicarbonate                                            | 11617 (53.5%)    | 4838 (60.5%)     | 16455 (55.4%)    |
| Calcium chloride or calcium gluconate                         | 6261 (28.8%)     | 2845 (35.6%)     | 9106 (30.6%)     |
| Atropine                                                      | 8929 (41.1%)     | 3344 (41.8%)     | 12273 (41.3%)    |
| Lidocaine                                                     | 930 (4.3%)       | 299 (3.7%)       | 1229 (4.1%)      |
| Amiodarone                                                    | 3889 (17.9%)     | 1263 (15.8%)     | 5152 (17.3%)     |
| <b>Hospital characteristics</b>                               |                  |                  |                  |
| Teaching hospital                                             |                  |                  |                  |
| None                                                          | 2819 (13.0%)     | 697 (8.7%)       | 3516 (11.8%)     |
| Minor                                                         | 5992 (27.6%)     | 4120 (51.5%)     | 10112 (34.0%)    |
| Major                                                         | 12910 (59.4%)    | 3176 (39.7%)     | 16086 (54.1%)    |

**Table 1: Primary Cohort Characteristics (Acute Physiologic Decline)**

|                                |               |              |               |
|--------------------------------|---------------|--------------|---------------|
| Hospital size                  |               |              |               |
| Less than 200 beds             | 2290 (10.5%)  | 575 (7.2%)   | 2865 (9.6%)   |
| 200 - 499 beds                 | 10644 (49.0%) | 2907 (36.4%) | 13551 (45.6%) |
| 500 or more beds               | 8787 (40.5%)  | 4511 (56.4%) | 13298 (44.8%) |
| Site region                    |               |              |               |
| North Mid Atlantic             | 2381 (11.0%)  | 742 (9.3%)   | 3123 (10.5%)  |
| South Atlantic and Puerto Rico | 6127 (28.2%)  | 2908 (36.4%) | 9035 (30.4%)  |
| North Central                  | 5440 (25.0%)  | 1420 (17.8%) | 6860 (23.1%)  |
| South Central                  | 5416 (24.9%)  | 2738 (34.3%) | 8154 (27.4%)  |
| Mountain and Pacific           | 2357 (10.9%)  | 185 (2.3%)   | 2542 (8.6%)   |
| Site Racial Composition        |               |              |               |
| Less than 10% Black            | 7840 (36.1%)  | 401 (5.0%)   | 8241 (27.7%)  |
| 10-30% Black                   | 8083 (37.2%)  | 2191 (27.4%) | 10274 (34.6%) |
| More than 30% Black            | 5798 (26.7%)  | 5401 (67.6%) | 11199 (37.7%) |

<sup>1</sup>Truncated after 120 minutes

<sup>2</sup>Truncated after 30 minutes

CPA = cardiopulmonary arrest, MEWS = modified early warning score, CNS = central nervous system, ECG = electrocardiogram, PEA = pulseless electrical activity, CPR = cardiopulmonary resuscitation

Table 2: Primary Cohort Association of Race with MET Evaluation (acute physiologic decline)

|                          | <b>MET Evaluation</b>  |         |
|--------------------------|------------------------|---------|
|                          | Odds ratio<br>(95% CI) | P-value |
| <b>Black</b>             |                        | 0.617   |
| White                    | Reference              |         |
| Black                    | 1.02 (0.94, 1.11)      |         |
| <b>Teaching hospital</b> |                        | 0.795   |
| Major                    | 0.94 (0.69, 1.27)      |         |
| Minor                    | Reference              |         |
| None                     | 1.04 (0.70, 1.55)      |         |

Output shows estimates based on patient race. Model adjusts for hospital teaching status. The model also uses a robust variance estimator to account for within-hospital correlation, and weights patients according to their propensity.
